# Supplementary material for: Coordination of robust single cell rhythms in the Arabidopsis circadian clock via spatial waves of gene expression
Source: eLife journal article supplement (doi:10.7554/elife.31700), 2018-04-26
Supplement: supp [file elife-31700-supp-v1.zip]

Archive with 20 entries (20 files):
- elife_poa_e31700_Video_4.avi
- elife_poa_e31700_Video_2.mov
- elife_poa_e31700_Figure_3_figure_supplement_1.pdf
- elife_poa_e31700_Figure_1_figure_supplement_2.pdf
- elife_poa_e31700_Figure_3_figure_supplement_4.pdf
- elife_poa_e31700_Figure_1_figure_supplement_5.pdf
- elife_poa_e31700_Transparent_Reporting_File.pdf
- elife_poa_e31700_Figure_1_source_data_2.docx
- elife_poa_e31700_Figure_2_figure_supplement_2.pdf
- elife_poa_e31700_Video_3.mov
- elife_poa_e31700_Figure_1_figure_supplement_6.pdf
- elife_poa_e31700_Figure_2_figure_supplement_1.pdf
- elife_poa_e31700_Video_1.mov
- elife_poa_e31700_Figure_2_figure_supplement_3.pdf
- elife_poa_e31700_Figure_3_figure_supplement_2.pdf
- elife_poa_e31700_Figure_1_figure_supplement_1.pdf
- elife_poa_e31700_Figure_1_source_data_1.docx
- elife_poa_e31700_Figure_1_figure_supplement_4.pdf
- elife_poa_e31700_Figure_1_figure_supplement_3.pdf
- elife_poa_e31700_Figure_3_figure_supplement_3.pdf
