# Supplementary material for: Coordination of robust single cell rhythms in the Arabidopsis circadian clock via spatial waves of gene expression
Source: eLife journal article supplement (doi:10.7554/elife.31700), 2018-04-26
Supplement: supp [file elife-31700-supp-v1.zip › elife_poa_e31700_Figure_1_figure_supplement_2.pdf]

CONFOCAL

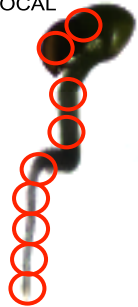

EXP

IMAGEJ

Remove  
Blank  
Images

Extracting  
YFP

Reducing  
Dimensionality

QC

Extracting  
RFP

Reducing  
Dimensionality

Extracting  
BF

BF

RFP

YFP

Positions

QC

Video

YFP Median

RFP Median

Semi-Auto  
Tracking

QC

Median  
Smooth

Load In

BF

RFP

YFP

Merge  
Channels

IMARIS

QC

Graphs and  
Stats
