# Supplementary figures and images for: Coordination of robust single cell rhythms in the Arabidopsis circadian clock via spatial waves of gene expression
Source: eLife journal article supplement (doi:10.7554/elife.31700), 2018-04-26

**a**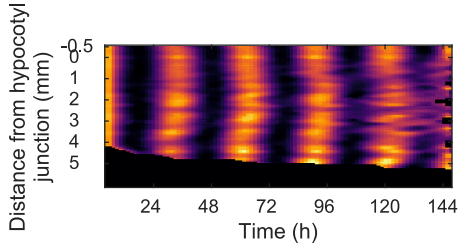**b**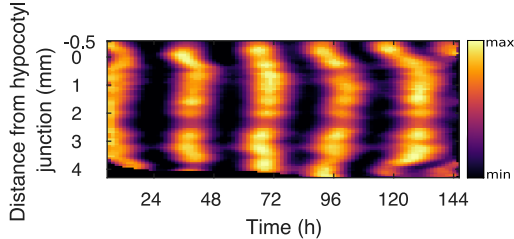

Supplement: supp [file elife-31700-supp-v1.zip › elife_poa_e31700_Figure_3_figure_supplement_1.pdf]

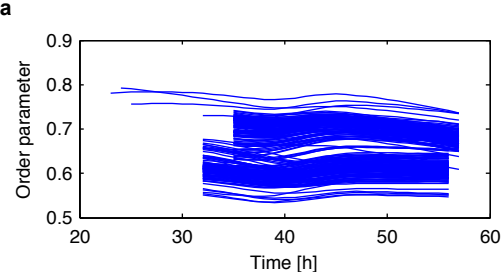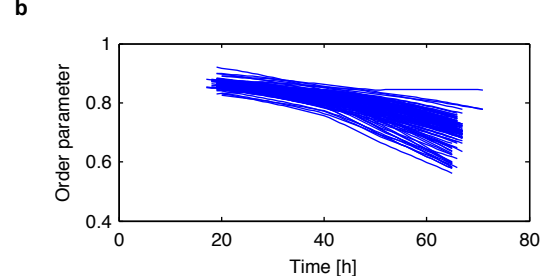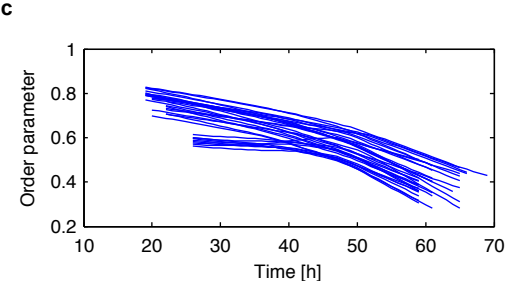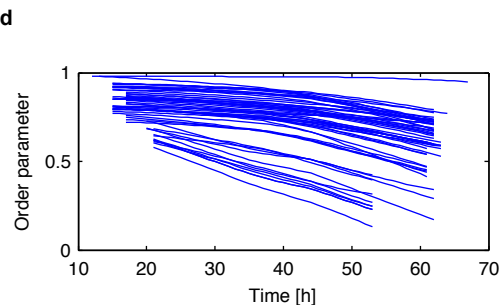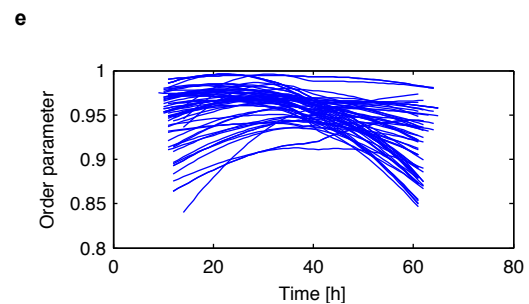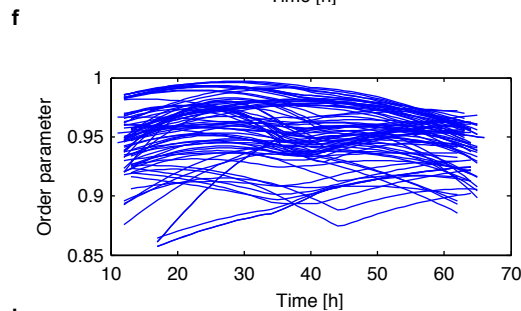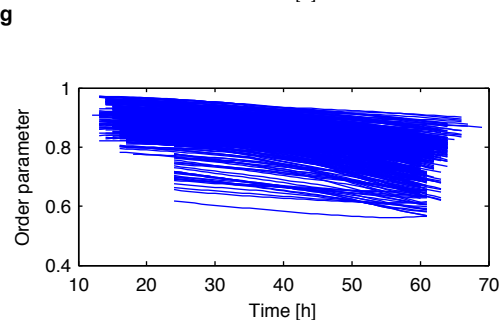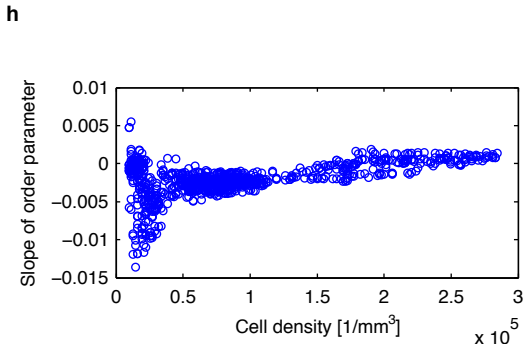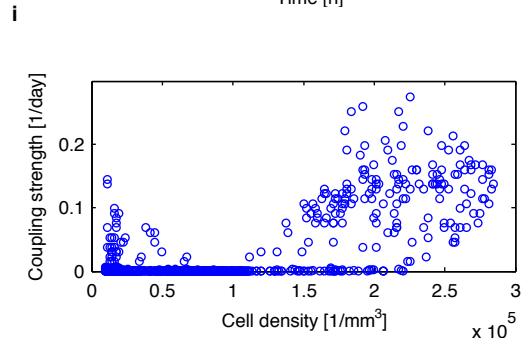

Supplement: supp [file elife-31700-supp-v1.zip › elife_poa_e31700_Figure_3_figure_supplement_4.pdf]

### ROOT TIP

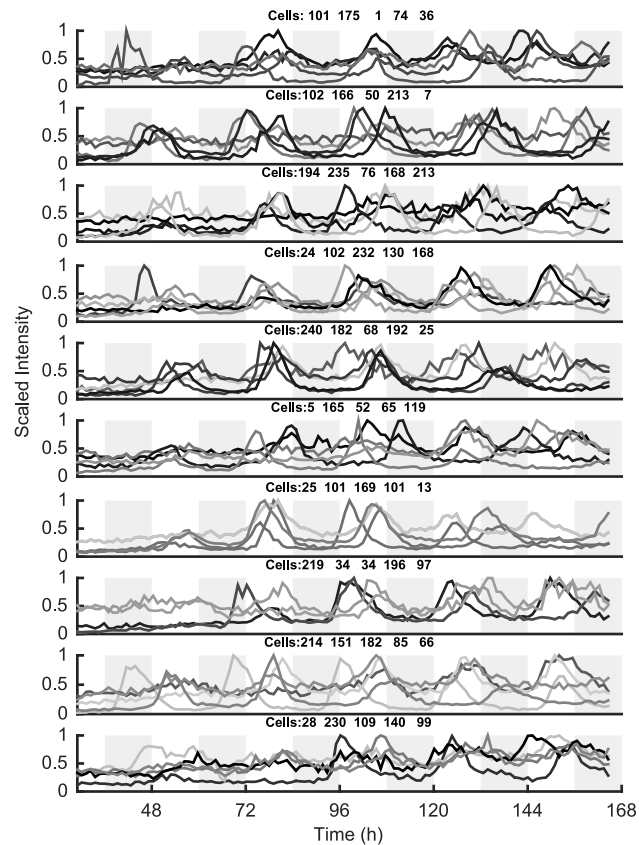

### HYPOCOTYL

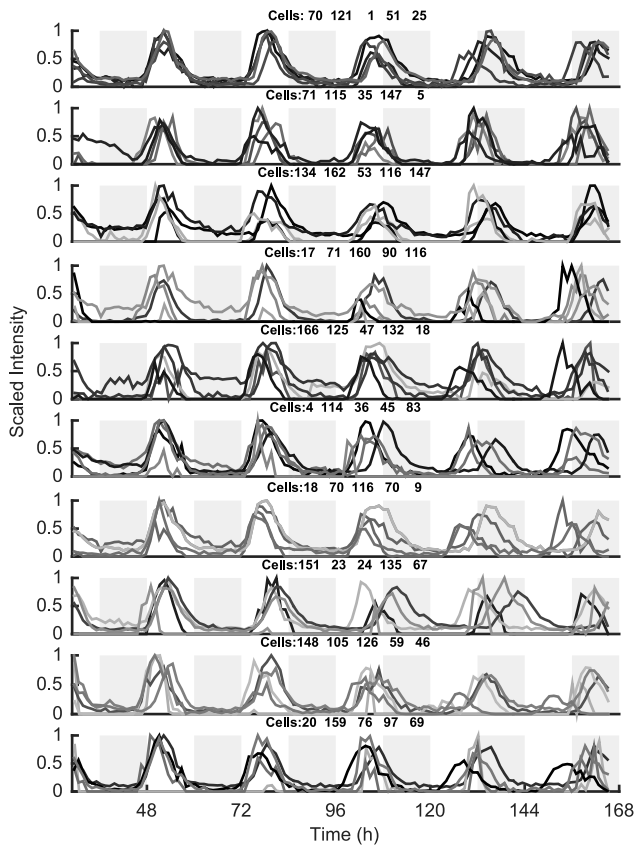

### ROOT

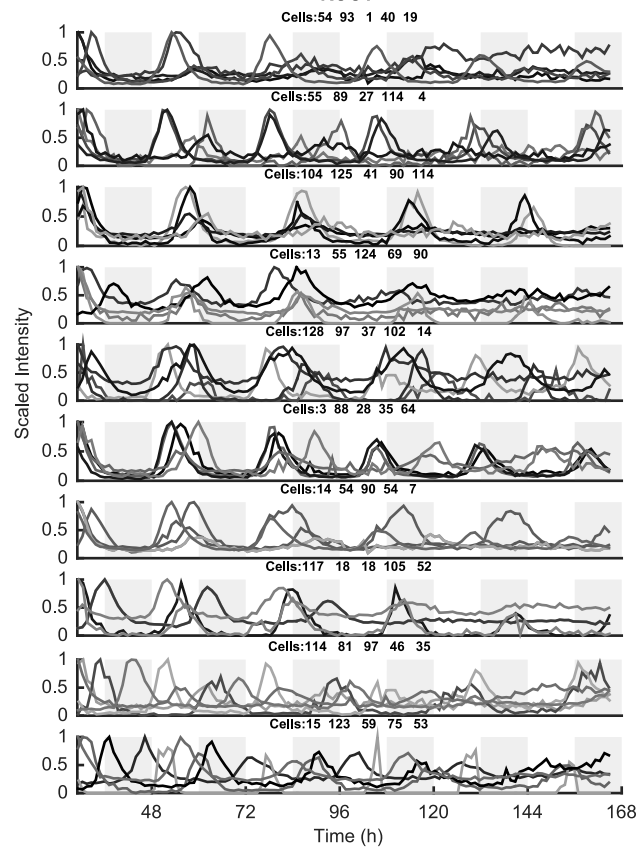

### COTYLEDON

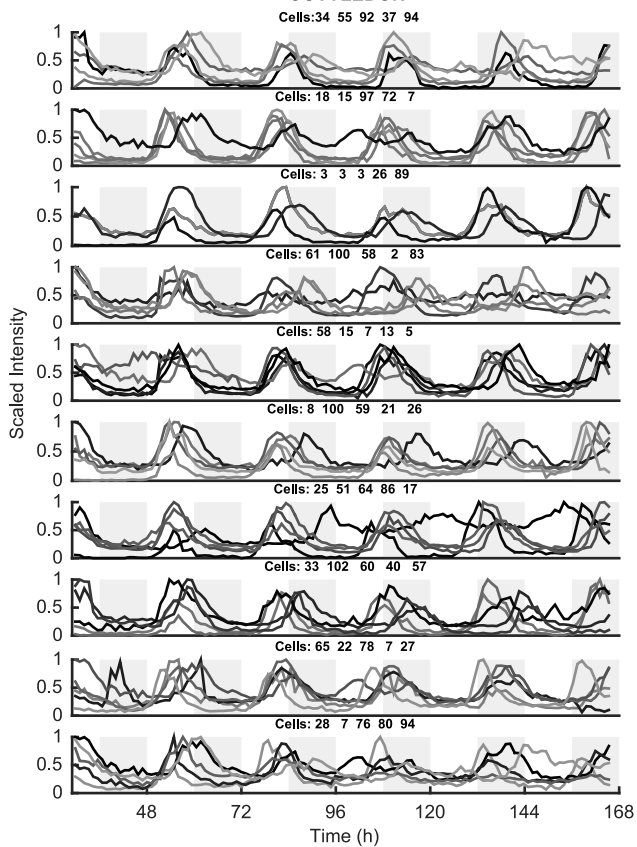

Supplement: supp [file elife-31700-supp-v1.zip › elife_poa_e31700_Figure_1_figure_supplement_5.pdf]

**a**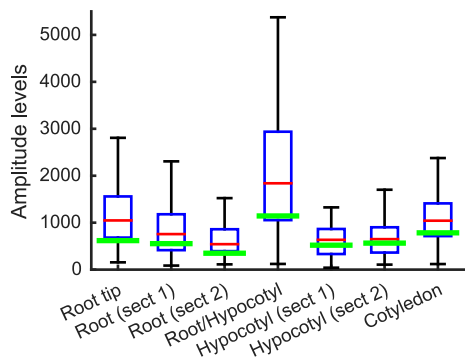**b**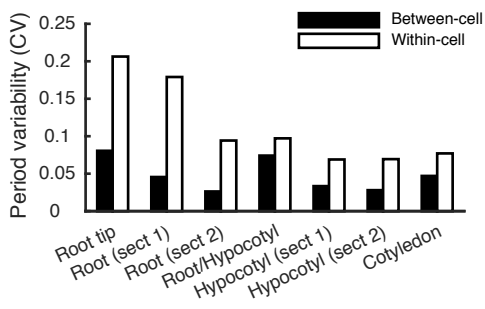**c**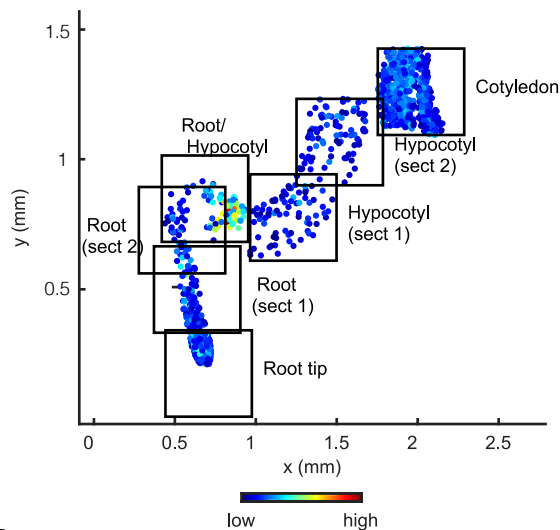**d**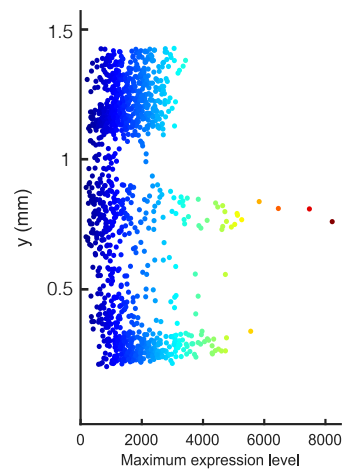**e**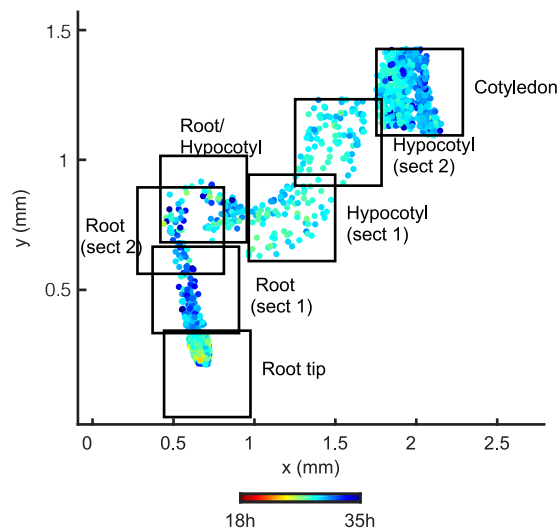**f**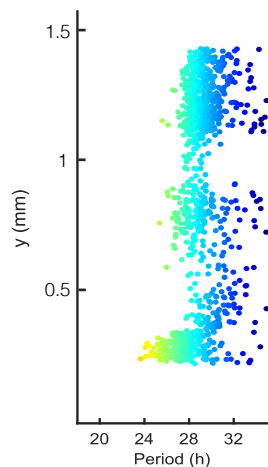**g**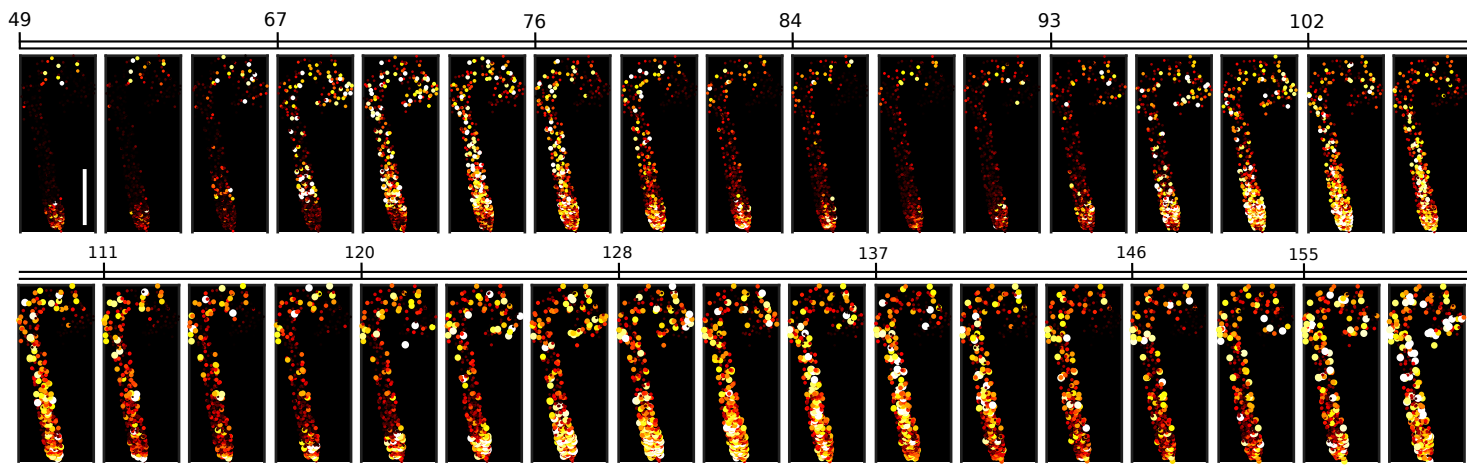

Supplement: supp [file elife-31700-supp-v1.zip › elife_poa_e31700_Figure_2_figure_supplement_2.pdf]

**a**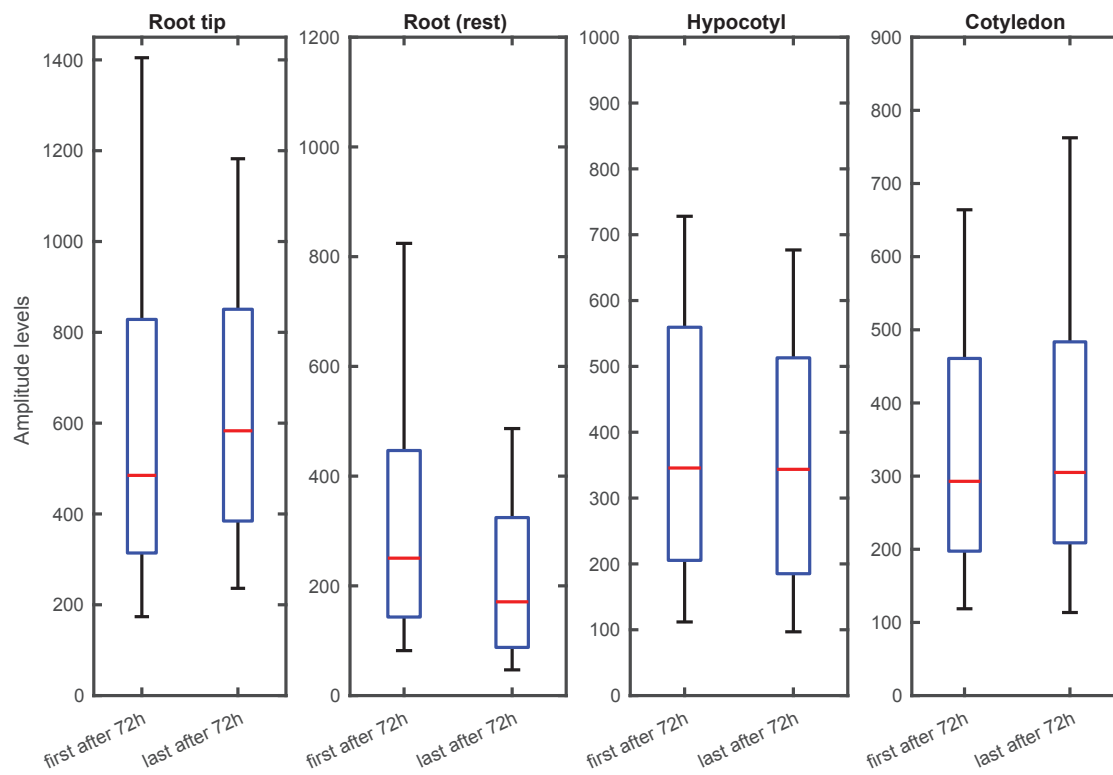**b**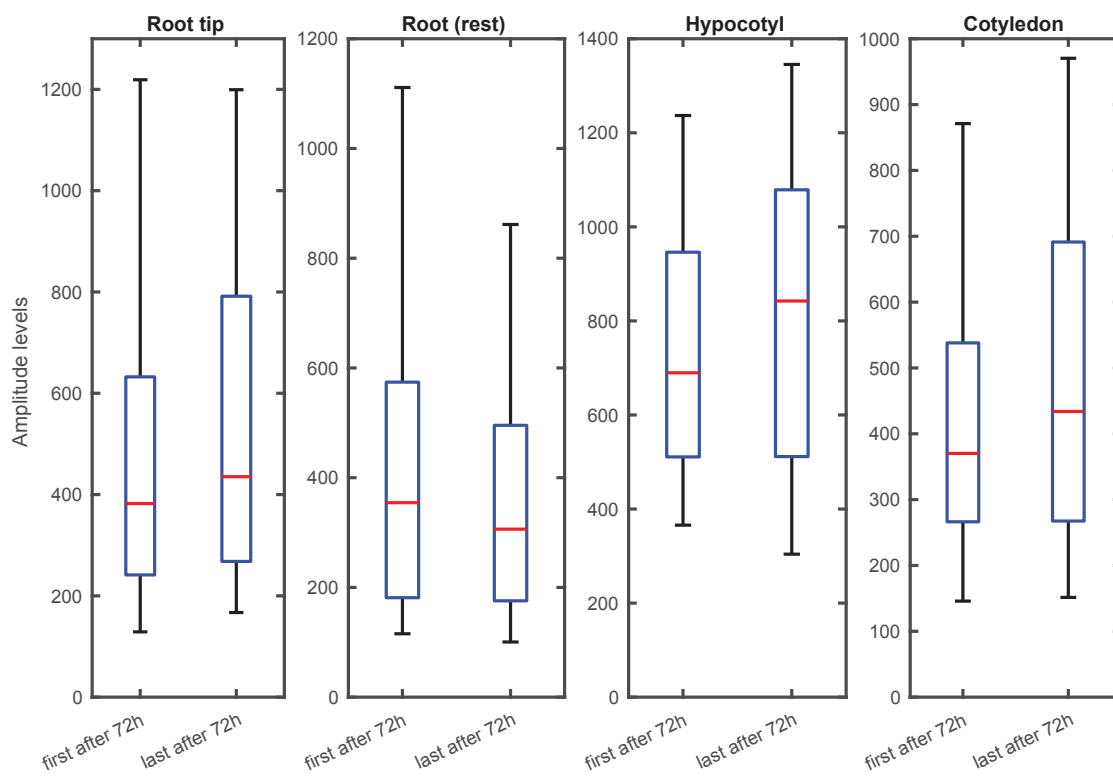

Supplement: supp [file elife-31700-supp-v1.zip › elife_poa_e31700_Figure_1_figure_supplement_6.pdf]

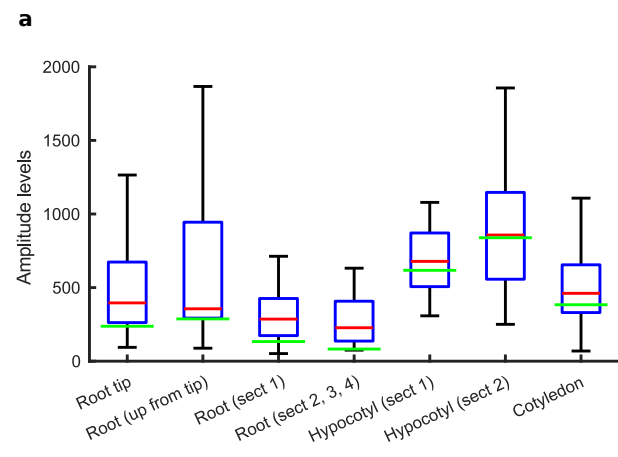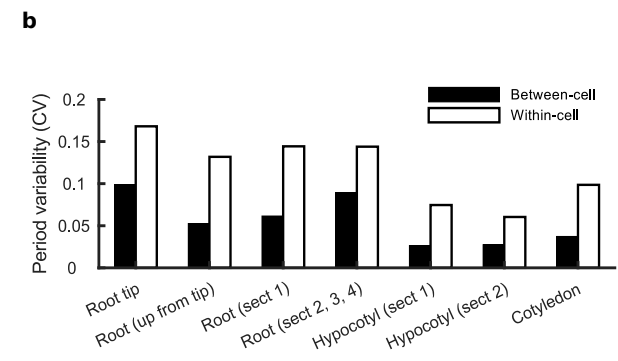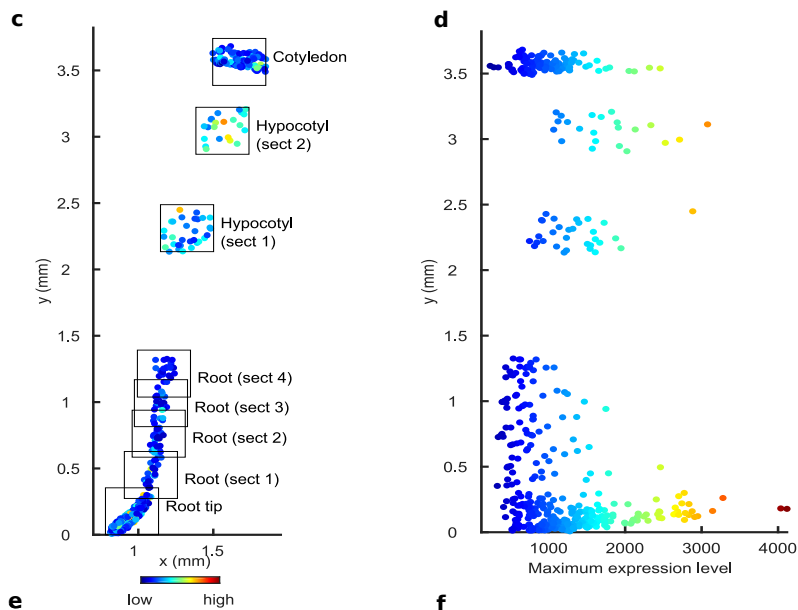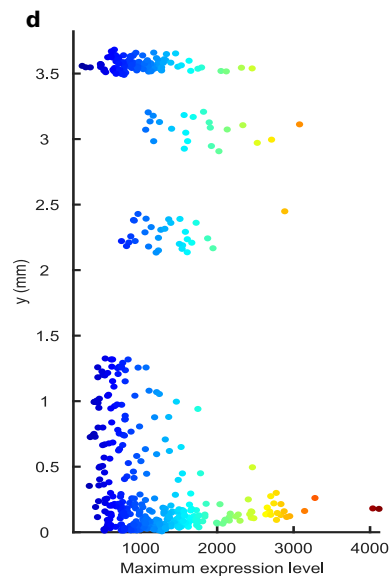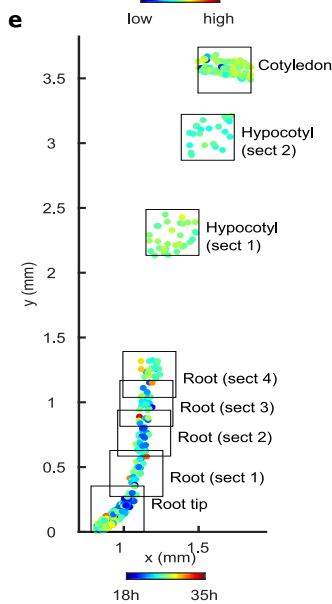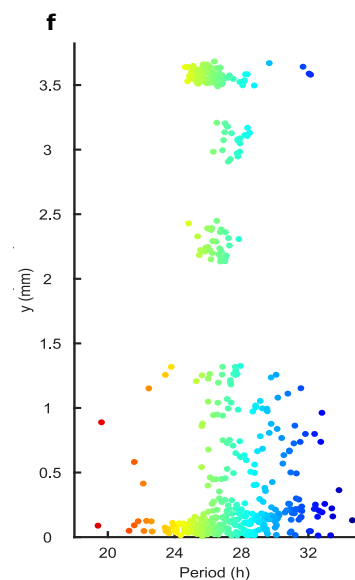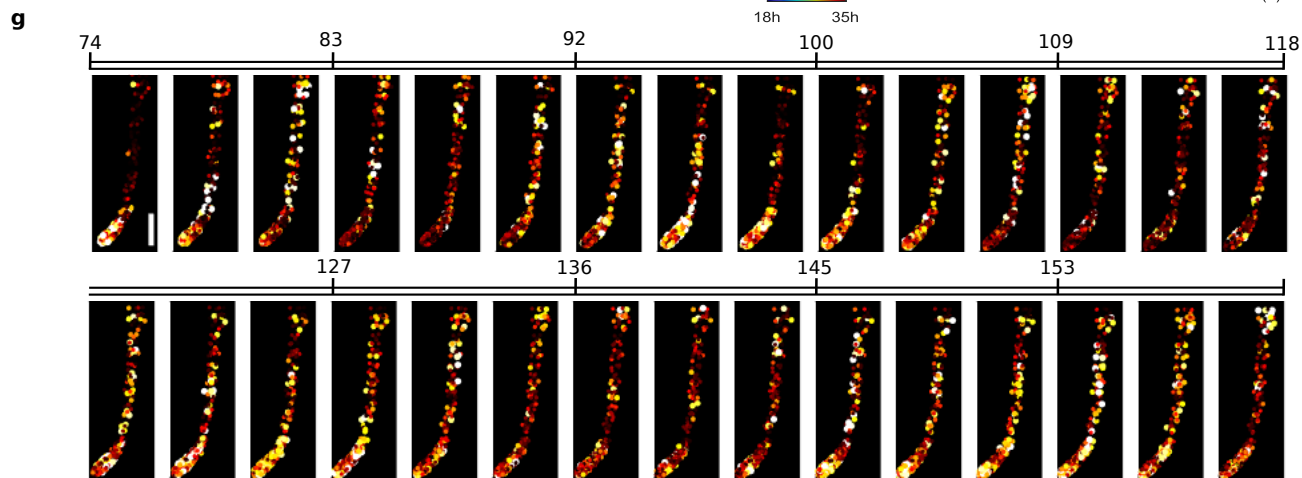

Supplement: supp [file elife-31700-supp-v1.zip › elife_poa_e31700_Figure_2_figure_supplement_1.pdf]

**a**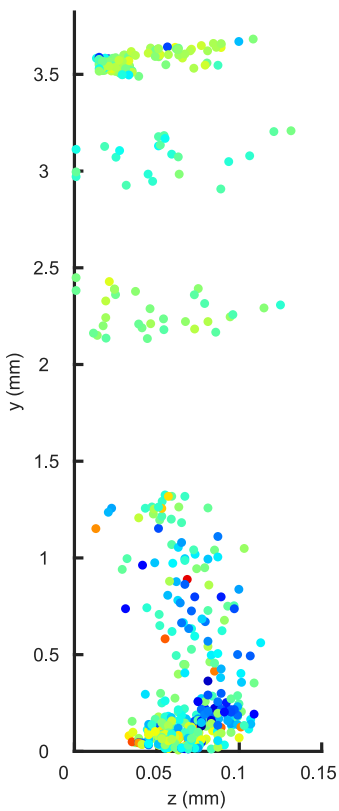**b**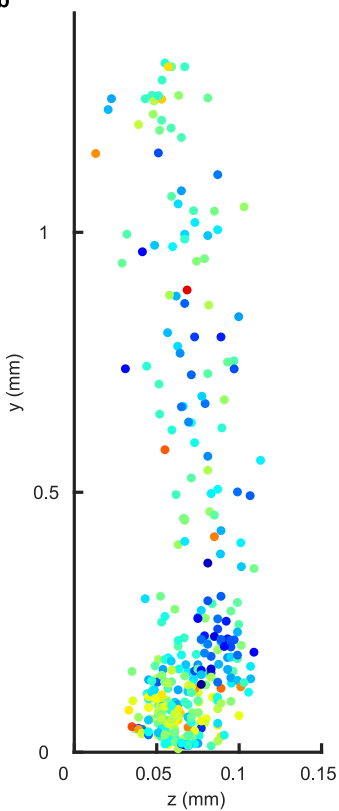**c**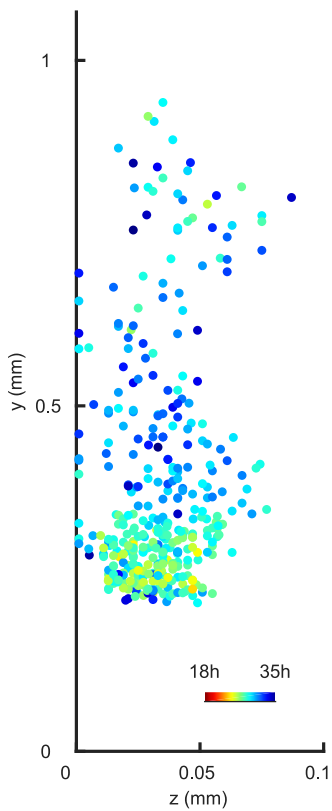

Supplement: supp [file elife-31700-supp-v1.zip › elife_poa_e31700_Figure_2_figure_supplement_3.pdf]

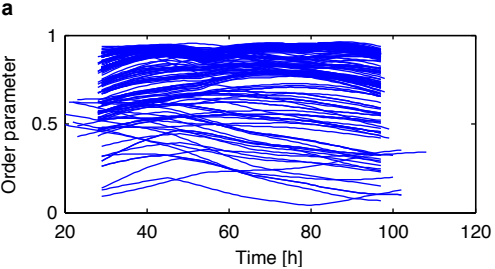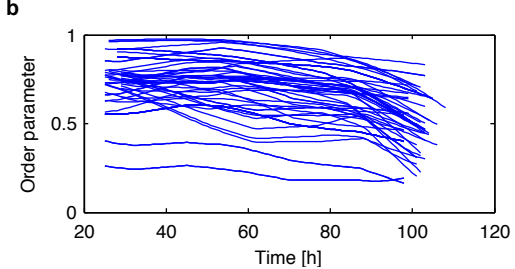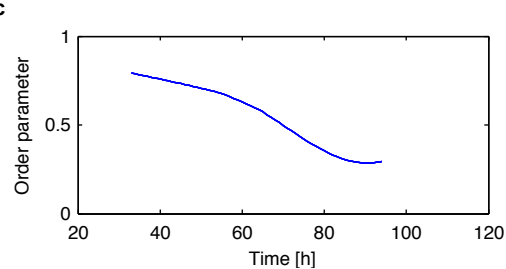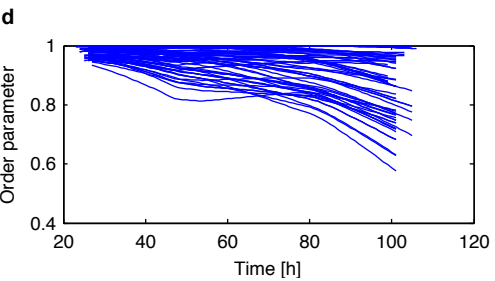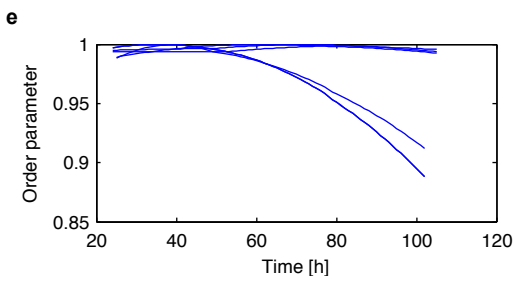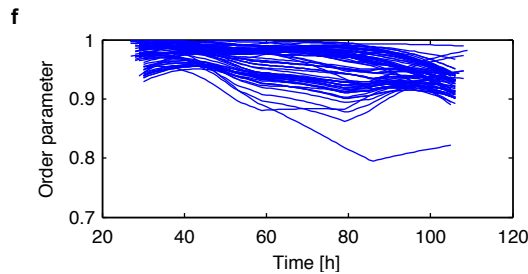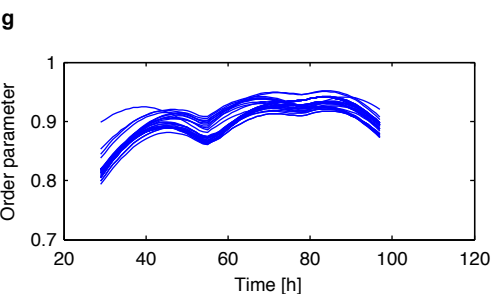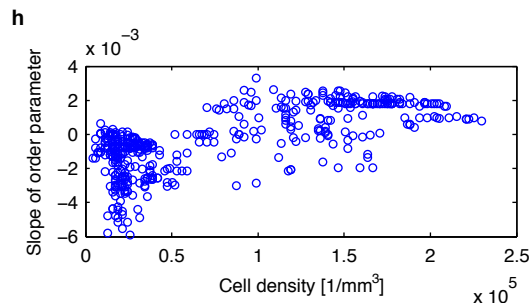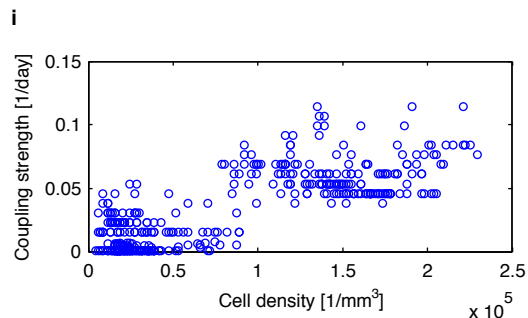

Supplement: supp [file elife-31700-supp-v1.zip › elife_poa_e31700_Figure_3_figure_supplement_2.pdf]

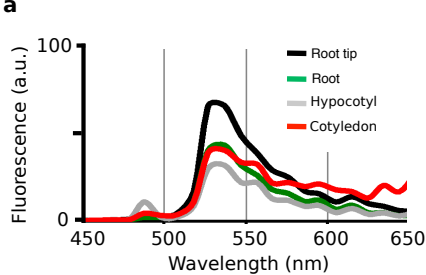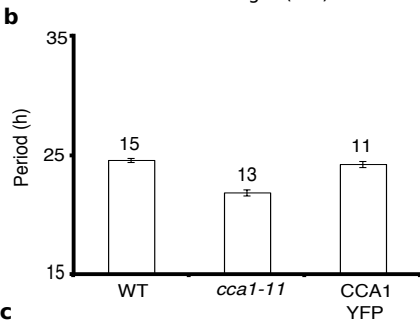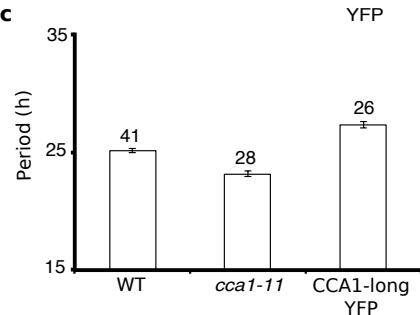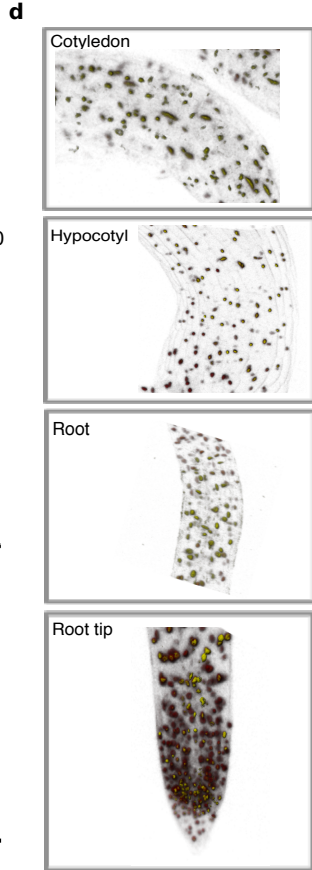

Supplement: supp [file elife-31700-supp-v1.zip › elife_poa_e31700_Figure_1_figure_supplement_1.pdf]

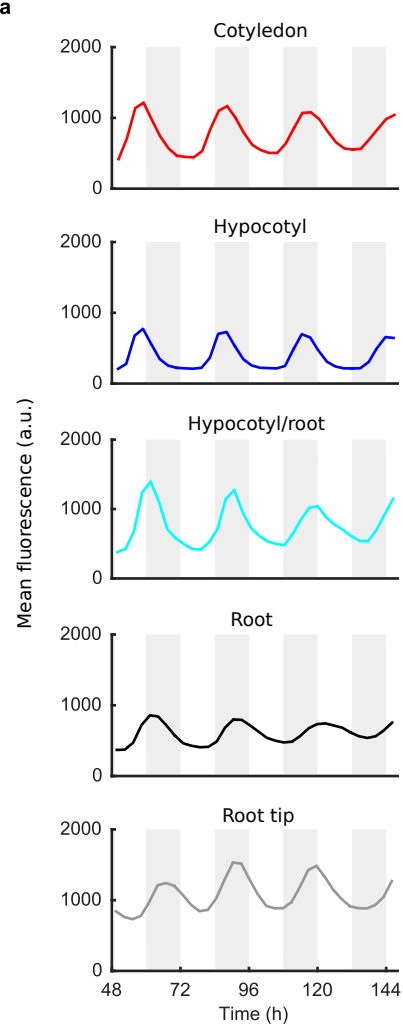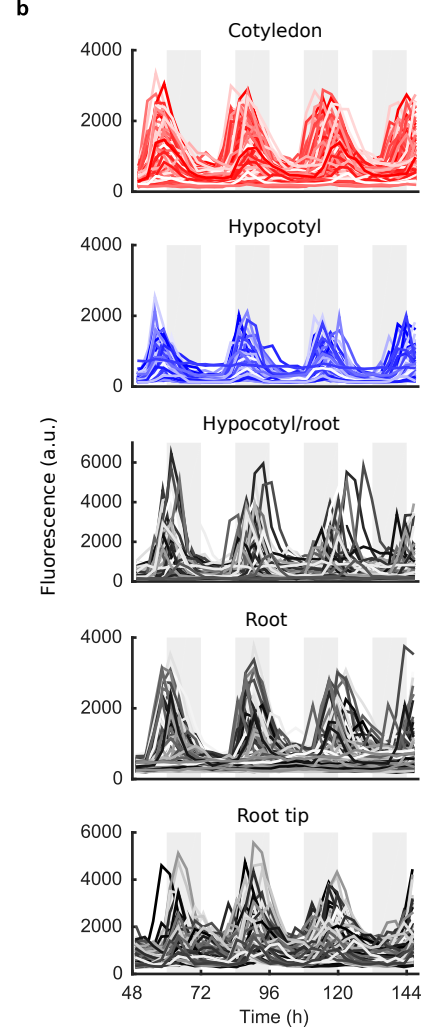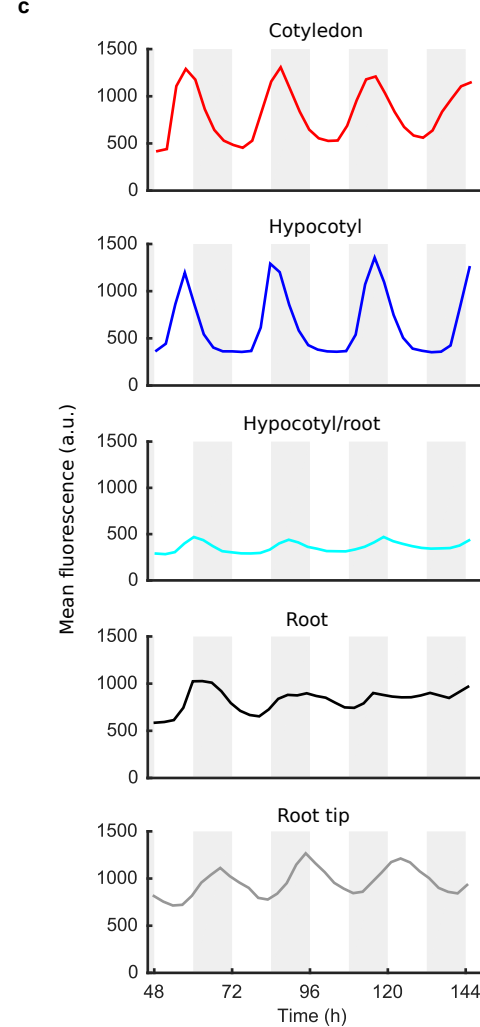

Supplement: supp [file elife-31700-supp-v1.zip › elife_poa_e31700_Figure_1_figure_supplement_4.pdf]

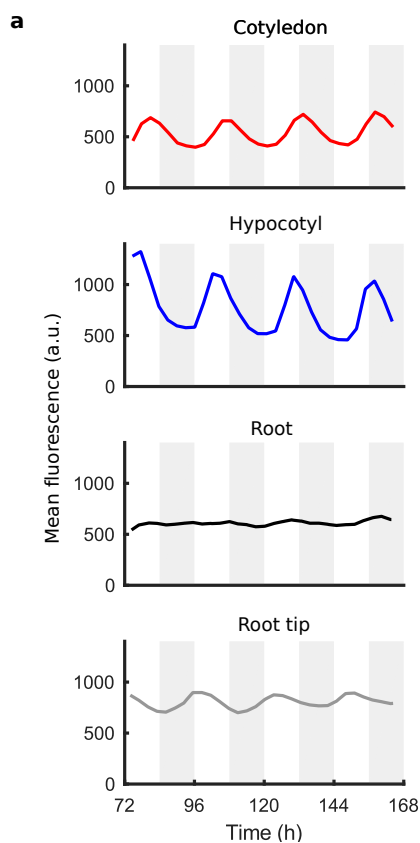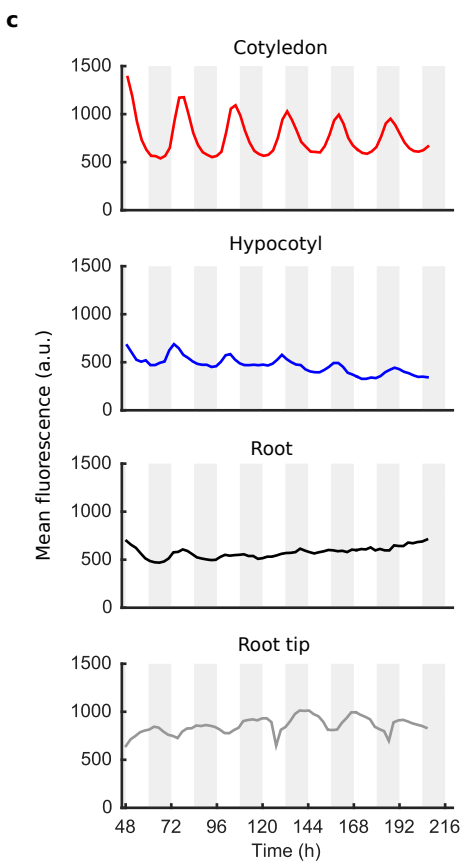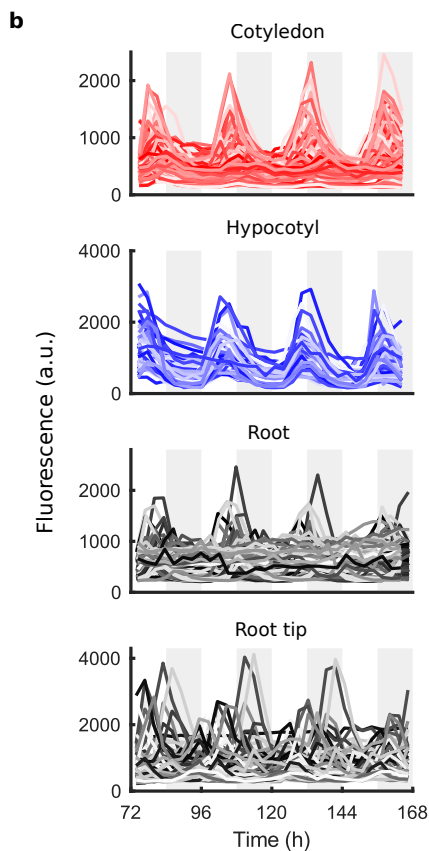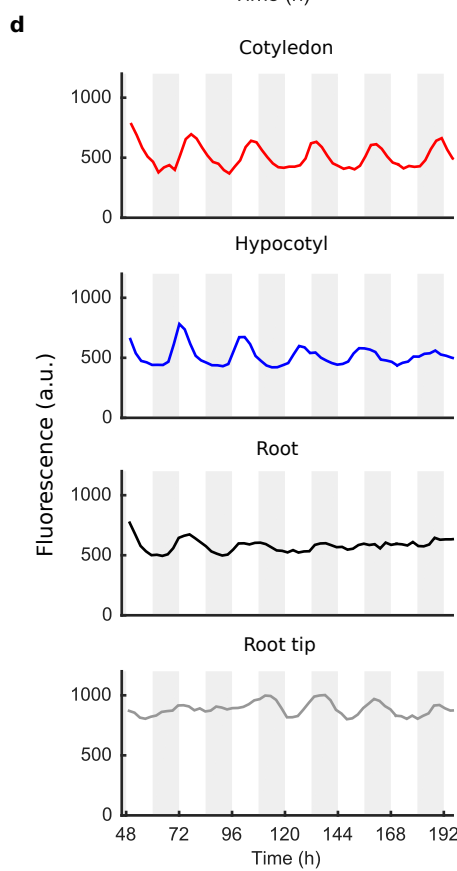

Supplement: supp [file elife-31700-supp-v1.zip › elife_poa_e31700_Figure_1_figure_supplement_3.pdf]

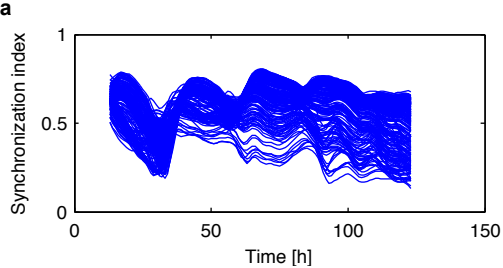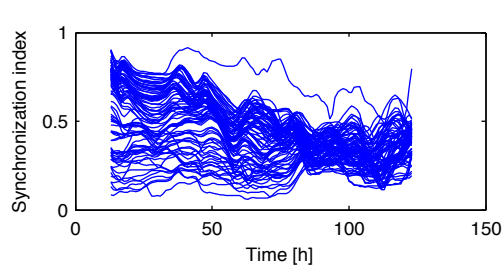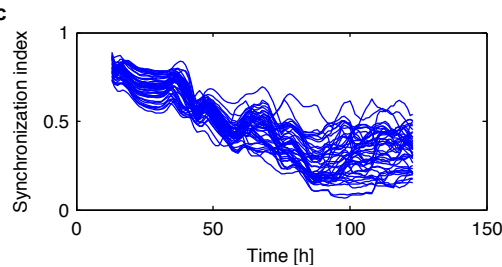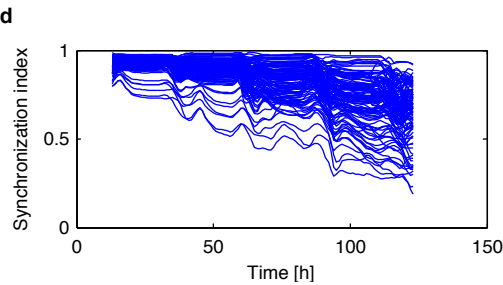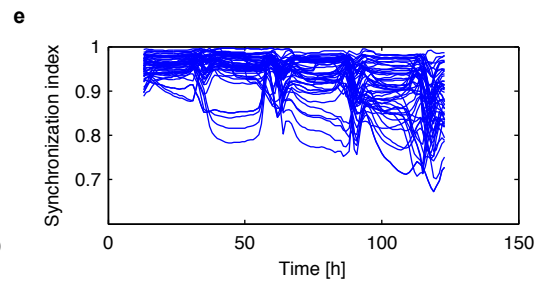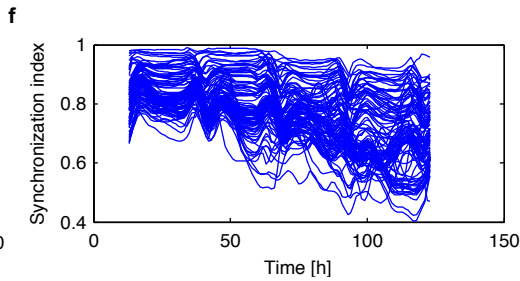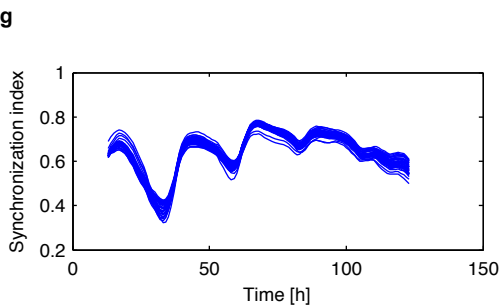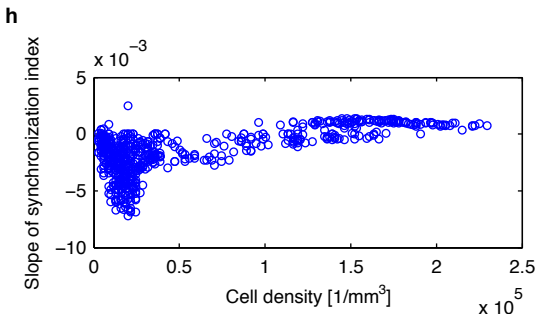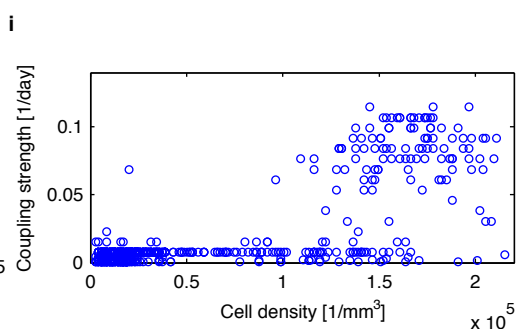

Supplement: supp [file elife-31700-supp-v1.zip › elife_poa_e31700_Figure_3_figure_supplement_3.pdf]
